# Supplementary material
Source: PubMed Central journal article supplement (PMC2640204)
Supplement: ddn406_1.pdf [file ddn406_1.pdf]

## Supplemental Information

**Table S1** Primer sequences used for genotyping of transgenic animals and qRT-PCR.

| <b>Genotyping</b>                                   | <b>Forward Primer</b>    | <b>Reverse Primer</b>    |
|-----------------------------------------------------|--------------------------|--------------------------|
| MOP-T (promoter to coding region of Rds)            | GGCTTAGGGAGAGAAGGTCA     | GGCTTCCACTTG CGTACTTG    |
| COP-T (promoter to coding region of Rds)            | CTAAGTC CAGGCCCAATTAAGAG | GAGTTGTTGGTGAGCTGGTACTGG |
| MOP-T & COP-T (Coding region of Rds to SV-40 PolyA) | CTCTGTCCAAGTGTGAGTCC     | ACCACAAC TAGAATGCAGTG    |
| <b>qRT-PCR</b>                                      |                          |                          |
| Rds                                                 | GTTCAAGTGCTGTGGGAACA     | CTGTGTGGAGGTAGCGGAGT     |
| Hprt                                                | GCAAAC TTTGCTTTCCCTGGTT  | CAAGGGCATATCCAACAACA     |
